# Supplementary material for: Can Light Spectrum Composition Increase Growth and Nutritional Quality of Linum usitatissimum L. Sprouts and Microgreens?
Source: MDPI journal article supplement (doi:10.3390/horticulturae8020098), 2022-01-22
Supplement: s1 [file s1]

Table S1. Total phenols (Phen tot.), flavonoids (Flav) and chlorogenic acid (CGA) content and antioxidant capacity (FRAP and ABTS) (mean values of first and second experiment) and anthocyanin (Anth.) (data of the second experiment), in sprouts and microgreens of flaxseed grown indoor under controlled condition with different light spectrum (100% blue (peak at 450 nm) (B), 100% red (peak at 660 nm) (R), 100% green (peak at 520 nm) (G) and R:G:B – 1:1:1 (RGB)).

| Stage                  | Light spectrum | Phen. tot.<br>(mg GAE g <sup>-1</sup> DW) | Flav.<br>(mg CAE g <sup>-1</sup> DW) | CGA<br>(mg g <sup>-1</sup> DW) | FRAP<br>(μmol Fe(II) g <sup>-1</sup> DW) | ABTS<br>(μmol TEAC g <sup>-1</sup> DW) | Anth.<br>(mg C3G g <sup>-1</sup> DW) |
|------------------------|----------------|-------------------------------------------|--------------------------------------|--------------------------------|------------------------------------------|----------------------------------------|--------------------------------------|
| Sprouts                | RGB            | 14.0±1.8                                  | 10.9±1.2                             | 0.97±0.2 d                     | 114.5±5.7 c                              | 33.9±5.6 cde                           | 0.342±0.032                          |
|                        | B              | 16.1±1.5                                  | 10.2±0.9                             | 0.79±0.1 d                     | 114.0±5.6 c                              | 29.9±3.0 e                             | 0.256±0.046                          |
|                        | R              | 13.6±1.1                                  | 10.9±0.6                             | 1.21±0.1 d                     | 112.7±8.6 c                              | 32.1±0.9 de                            | 0.278±0.035                          |
|                        | G              | 12.4±0.7                                  | 10.6±0.5                             | 0.84±0.1 d                     | 104.5±4.0 c                              | 33.0±5.2 de                            | 0.209±0.020                          |
| Microgreens            | RGB            | 28.4±1.0                                  | 20.0±0.8                             | 7.60±0.4 ab                    | 164.7±10.7 b                             | 61.2±2.4 ab                            | 0.322±0.055                          |
|                        | B              | 32.0±1.7                                  | 21.2±1.7                             | 9.42±0.8 a                     | 218.4±17.9 a                             | 68.2±2.2 a                             | 0.199±0.031                          |
|                        | R              | 24.7±2.3                                  | 18.4±0.6                             | 6.39±0.5 bc                    | 138.9±3.0 bc                             | 49.7±3.0 bc                            | 0.121±0.019                          |
|                        | G              | 25.0±2.1                                  | 18.7±0.7                             | 4.66±0.5 c                     | 127.3±8.6 bc                             | 46.2±1.5 bcd                           | 0.090±0.008                          |
| Sprouts                |                | 14.0±0.7 b                                | 10.6±0.4 b                           | 0.95±0.07 b                    | 111.4±3.0 b                              | 32.2±1.9 b                             | 0.272±0.020 a                        |
| Microgreens            |                | 27.6±1.1 a                                | 19.6±0.5 a                           | 7.02±0.45 a                    | 162.3±9.0 a                              | 56.3±2.1 a                             | 0.183±0.030 b                        |
| RGB                    |                | 21.2±2.4 ab                               | 15.4±1.5                             | 4.28±1.02                      | 139.6±9.5 b                              | 47.6±5.0 ab                            | 0.332±0.029 a                        |
| B                      |                | 24.0±2.6 a                                | 15.7±1.9                             | 5.11±1.35                      | 166.2±18.1 a                             | 49.0±6.0 a                             | 0.228±0.028 b                        |
| R                      |                | 19.2±2.1 b                                | 14.7±1.2                             | 3.80±0.82                      | 125.8±5.9 b                              | 40.9±3.0 ab                            | 0.200±0.039 b                        |
| G                      |                | 18.7±2.2 b                                | 14.6±1.3                             | 2.75±0.63                      | 115.9±5.7 b                              | 39.6±3.3 b                             | 0.150±0.028 b                        |
| ANOVA                  |                |                                           |                                      |                                |                                          |                                        |                                      |
| Stage                  |                | ***                                       | ***                                  | ***                            | ***                                      | ***                                    | **                                   |
| Light spectrum         |                | **                                        | ns                                   | ***                            | ***                                      | *                                      | ***                                  |
| Stage x light spectrum |                | ns                                        | ns                                   | ***                            | ***                                      | **                                     | ns                                   |

Data presented are the mean ± standard error ( $n = 6$  or  $n = 3$  for Anth). Means flanked by the same letter are not statistically different for  $P = 0.05$  after LSD test. Significance level: \*\*\*  $P \leq 0.001$ ; \*\*  $P \leq 0.01$ ; \*  $P \leq 0.05$ ; ns = not significant.
